# Supplementary material for: Comparison of Ceria-Supported Catalysts for Attaining NO - NO2 Equilibrium at Industrial Nitric Acid Plant Conditions
Source: Preprints.org preprint supplement (doi:10.20944/preprints202310.0537.v1), 2023-10-10
Supplement: Supplementary file 1 [file supplementary]

# Comparison of Ceria-Supported Catalysts for Attaining NO - NO<sub>2</sub> Equilibrium at Industrial Nitric Acid Plant Conditions

Jithin Gopakumar<sup>1</sup>, Albert Miro i Rovira<sup>1</sup>, Bjørn Christian Enger<sup>2</sup>, David Waller<sup>3</sup>, Magnus Rønning<sup>1\*</sup>

1. Norwegian University of Science and Technology (NTNU), Department of Chemical Engineering, Sem Sælands vei 4, NO-7491 Trondheim, Norway

2. SINTEF Industry, Kinetic, and Catalysis group, P.O. Box 4760 Torgarden, NO-7465 Trondheim, Norway

3. YARA Technology Center, Herøya Forskningspark, Bygg 92, Hydrovegen 67, NO-3936 Porsgrunn, Norway

\*Corresponding author, E-mail address: magnus.ronning@ntnu.no (M. Rønning)

## S1 *In-situ* production of NO<sub>2</sub>

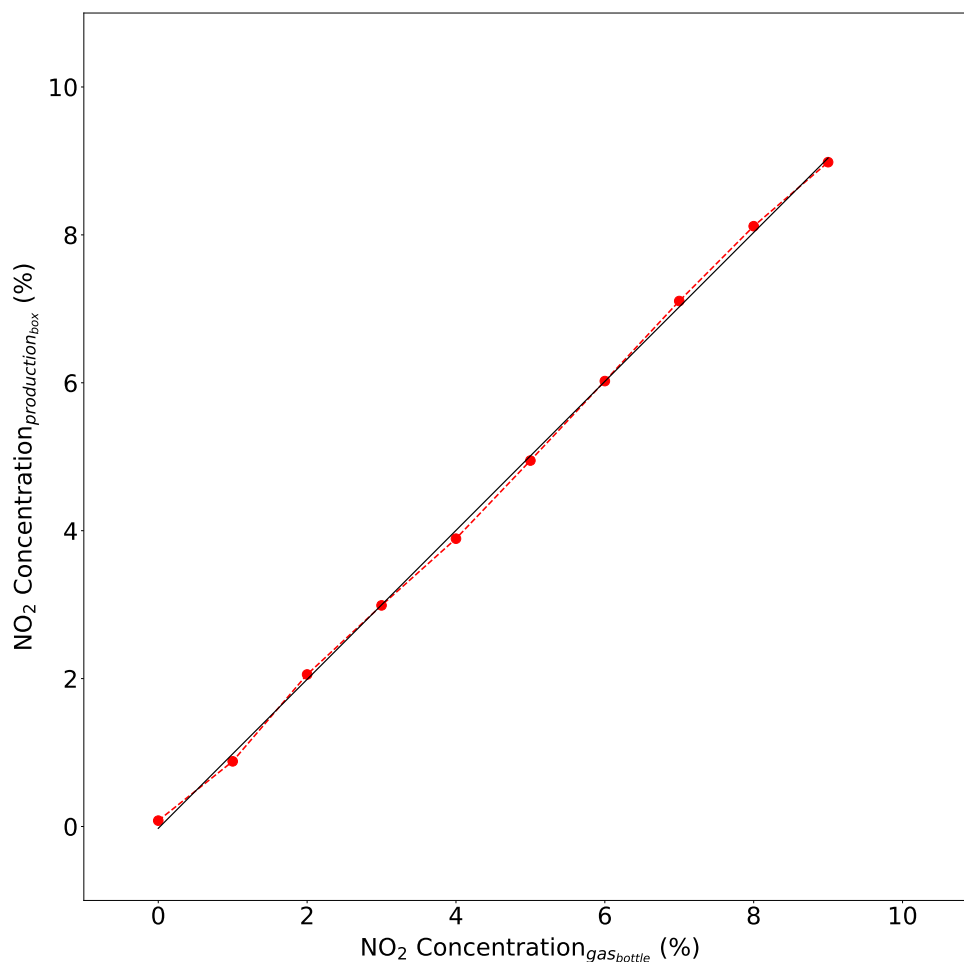

Figure S1: Parity plot between NO<sub>2</sub> concentration from production box versus 10%NO<sub>2</sub>/Ar gas bottle. Note: This calibration was made at 150°C temperature and ambient pressure.

For activity measurements, all catalysts are subjected to two feed conditions with respect to temperature in the range of 150-400°C in this research work. Feed (ii) contains 2% NO<sub>2</sub> and as described in Section 2.3, NO<sub>2</sub> proportion increases with temperature and the ratio of N<sub>2</sub>O<sub>4</sub> increases with pressure. To produce NO<sub>2</sub> *in-situ*, the empty reactor was heated to 150°C and calculated amounts of NO and O<sub>2</sub> were mixed close to NO<sub>2</sub> production box (presented in Fig. 2), the mixture reacts inside the production box. It travels through the empty reactor to the MKS FTIR, where NO<sub>2</sub> concentration is determined. A pre-calibrated mass spectrometer monitors O<sub>2</sub>, N<sub>2</sub>, and Ar in the feed. The set points for NO and O<sub>2</sub> were estimated when 100% NO to NO<sub>2</sub> conversion was achieved inside the box with no excess oxygen. The NO<sub>2</sub> production box consists of a 45cm 1/8" stainless steel tube (SS-316) connected from "a" to "b" points and surrounded by cooling water (presented in Fig. 2). A thermocouple (T3) is placed inside the box to monitor the water temperature during the reaction. NO<sub>2</sub> is produced at 25°C inside the production box. No notable changes in NO conversion were detected when the same experiment was conducted with the exit of NO<sub>2</sub> production box (point "b") directly connected to the analyser bypassing the reactor. The same experiment with 2%NO<sub>2</sub>/Ar was repeated using NO<sub>2</sub> from 10%NO<sub>2</sub>/Ar gas bottle and dedicated mass flow controllers (the results are presented in Fig. S1).

An empty reactor was heated from 150-450°C with 2%NO<sub>2</sub>/Ar, no changes in NO<sub>2</sub> concentration were detected with respect to temperature (as seen in Fig. S2) in both ambient and 4bar pressures (inside the reactor). This simple *in-situ* production of NO<sub>2</sub> method can achieve higher concentrations of NO<sub>2</sub> which can be directly used for research to attain industrial concentrations of NO<sub>x</sub>.

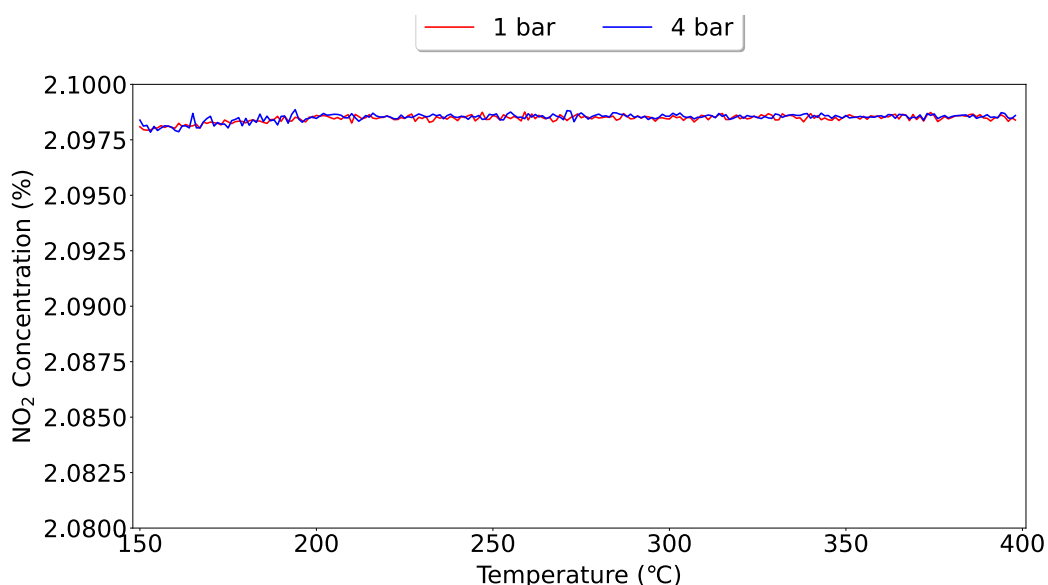

Figure S2: NO<sub>2</sub> concentration (%) as a function of temperature with 2% NO<sub>2</sub>/Ar, heated at a rate of 5°C/min at WHSV= 24,000 Ncm<sup>3</sup>/g<sub>cat</sub>h at ambient and 4 bar pressure. Note: *In-situ* production is atmospheric, while the reactor was pressurised upto 4bar to record NO<sub>2</sub> concentration stabilisation.

## S2 Chemisorption

Table S1 details the chemisorption program for the different catalysts.

Table S1: Chemisorption program for different ceria-based catalysts

| Sample                              | Pretreatment <sup>a</sup><br>Temperature | Reduction <sup>b</sup><br>Temperature | Pressure<br>range [mmHg] | Isotherm<br>Temperature | Adsorptive Gas  |
|-------------------------------------|------------------------------------------|---------------------------------------|--------------------------|-------------------------|-----------------|
| AgCeO <sub>2</sub>                  | 450 °C                                   | 50 °C                                 | 30 – 500                 | 50 °C                   | Hydrogen        |
| RuCeO <sub>2</sub>                  | 120 °C                                   | 400 °C                                | 30 – 500                 | 35 °C                   | Carbon Monoxide |
| RuMn <sub>5</sub> CeO <sub>2</sub>  | 120 °C                                   | 400 °C                                | 30 – 500                 | 35 °C                   | Carbon Monoxide |
| RuMn <sub>10</sub> CeO <sub>2</sub> | 120 °C                                   | 400 °C                                | 30 – 500                 | 35 °C                   | Carbon Monoxide |
| RuMn <sub>15</sub> CeO <sub>2</sub> | 120 °C                                   | 400 °C                                | 30 – 500                 | 35 °C                   | Carbon Monoxide |
| RuMn <sub>20</sub> CeO <sub>2</sub> | 120 °C                                   | 400 °C                                | 30 – 500                 | 35 °C                   | Carbon Monoxide |
| FeCeO <sub>2</sub>                  | 450 °C                                   | 350 °C                                | 30 – 500                 | 50 °C                   | Hydrogen        |
| RhCeO <sub>2</sub>                  | 400 °C                                   | 300 °C                                | 30 – 500                 | 35 °C                   | Hydrogen        |
| CoCeO <sub>2</sub>                  | 450 °C                                   | 350 °C                                | 30 – 500                 | 50 °C                   | Hydrogen        |
| NiCeO <sub>2</sub>                  | 450 °C                                   | 450 °C                                | 30 – 500                 | 50 °C                   | Hydrogen        |
| AuCeO <sub>2</sub>                  | 450 °C                                   | 450 °C                                | 30 – 500                 | 50 °C                   | Hydrogen        |
| IrCeO <sub>2</sub>                  | 120 °C                                   | 200 °C                                | 30 – 500                 | 35 °C                   | Carbon Monoxide |
| PtCeO <sub>2</sub>                  | 120 °C                                   | 200 °C                                | 30 – 500                 | 30 °C                   | Carbon Monoxide |

a. Pretreatment was performed under Ar with a dwell time of 1 hour.

b. The reduction was performed at respective temperatures as mentioned with a dwell time of 2 hours.

### S3 Catalytic conversion

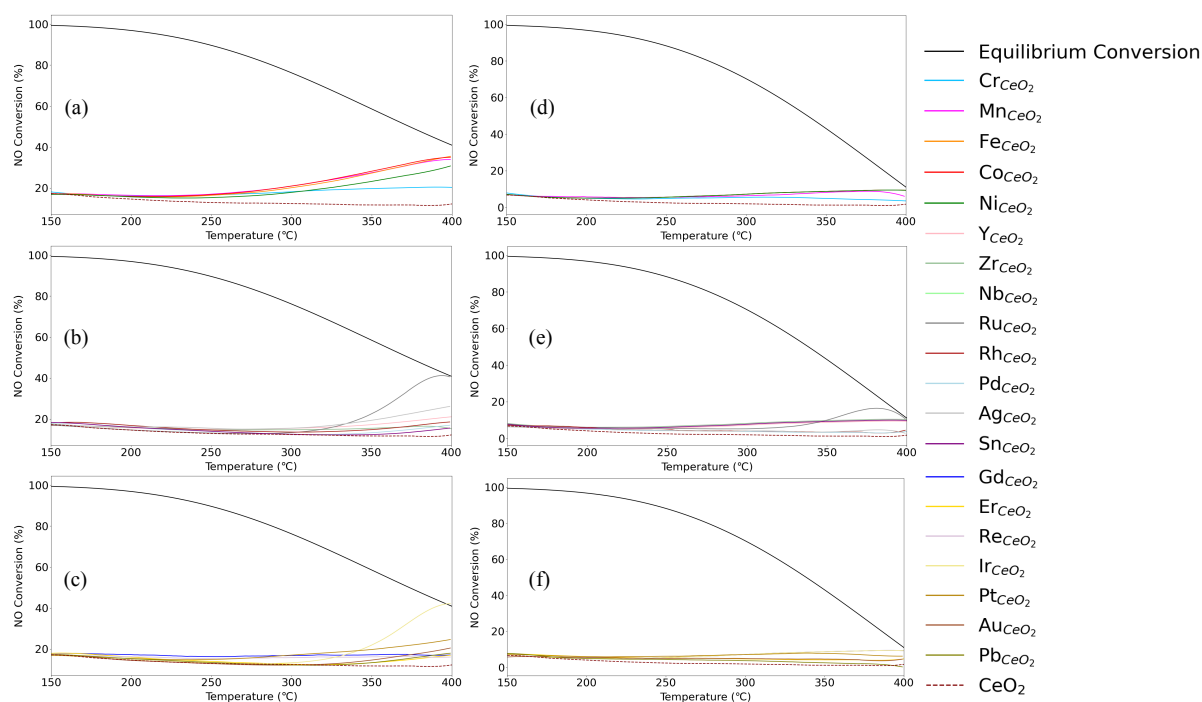

Figure S3: NO conversion (%) of (a) Period 4 mono-metallic catalysts, (b) Period 5 mono-metallic catalysts and (c) Period 6 mono-metallic catalysts in Feed (i): 10% NO, 6% O<sub>2</sub>, 15% H<sub>2</sub>O and rest Ar; (d) Period 4 mono-metallic catalysts, (e) Period 5 mono-metallic catalysts and (f) Period 6 mono-metallic catalysts in Feed (ii): 8% NO, 2% NO<sub>2</sub>, 5% O<sub>2</sub>, 15% H<sub>2</sub>O and rest Ar as a function of temperature, heated at a rate of 5°C/min at WHSV= 24,000 Ncm<sup>3</sup>/g<sub>cat</sub>h at ambient pressure.

## S4 X-ray diffraction plots

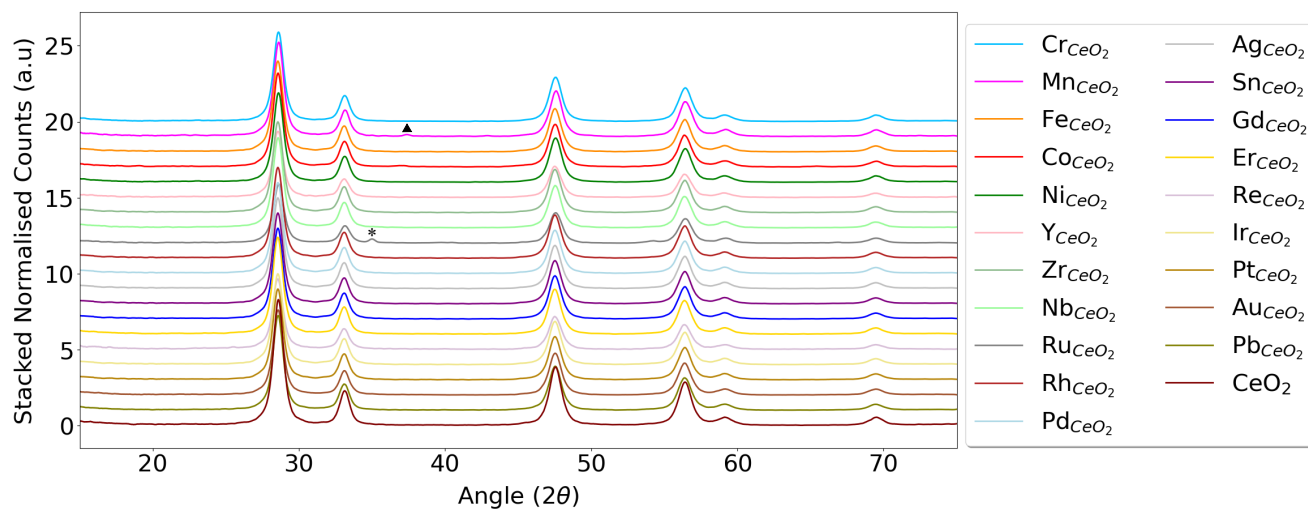

Figure S4: X-ray diffraction (XRD) patterns recorded for the CeO<sub>2</sub> support (PDF-00-034-0394), all mono-metallic catalyst samples in the 2θ range 5-75° with Cu K<sub>α</sub> radiation (1.54060Å). Diffraction peaks of RuO<sub>2</sub> (PDF-04-003-2008) are represented as \* and MnO<sub>2</sub> (PDF-04-007-3893) are presented as Δ

## S5 Apparent activation energy

Table S2: Apparent activation energy ( $E_a$ ) in two different feeds; Feed (i) 10% NO, 6% O<sub>2</sub>, 15% H<sub>2</sub>O and rest Ar and Feed (ii) 8% NO, 2% NO<sub>2</sub> 5% O<sub>2</sub>, 15% H<sub>2</sub>O and rest Ar, with a space velocity of 24,000 Ncm<sup>3</sup>/g<sub>cat</sub>h

| Catalyst                                      | $E_{a,feed(i)}^a$ | $R^2_{E_{a,feed(i)}}$ | $E_{a,feed(ii)}^b$ | $R^2_{E_{a,feed(ii)}}$ |
|-----------------------------------------------|-------------------|-----------------------|--------------------|------------------------|
| Cr <sub>CeO<sub>2</sub></sub>                 | 11.6±0.62         | 0.9973                | –                  | 0.9979                 |
| Mn <sub>CeO<sub>2</sub></sub>                 | 30.9±0.51         | 0.9997                | 24.34±0.68         | 0.9956                 |
| Fe <sub>CeO<sub>2</sub></sub>                 | 37.9±0.42         | 0.9998                | 12.41±0.67         | 0.9973                 |
| Co <sub>CeO<sub>2</sub></sub>                 | 34.5±0.54         | 0.9997                | 12.42±0.62         | 0.9974                 |
| Ni <sub>CeO<sub>2</sub></sub>                 | 37.9±0.81         | 0.9995                | 12.73±0.39         | 0.9973                 |
| Y <sub>CeO<sub>2</sub></sub>                  | 36.9±0.49         | 0.9998                | 13.41±0.65         | 0.9973                 |
| Zr <sub>CeO<sub>2</sub></sub>                 | 27.9±0.83         | 0.9991                | 10.93±0.58         | 0.9974                 |
| Nb <sub>CeO<sub>2</sub></sub>                 | 52.2±0.92         | 0.9981                | –                  | 0.8968                 |
| Ru <sub>CeO<sub>2</sub></sub>                 | 117.8±0.61        | 0.9998                | 81.7±0.52          | 0.99968                |
| Ru <sub>Mn<sub>5</sub>,CeO<sub>2</sub></sub>  | 47.0±0.81         | 0.9996                | 91.16±0.66         | 0.9997                 |
| Ru <sub>Mn<sub>10</sub>,CeO<sub>2</sub></sub> | 39.4±0.55         | 0.9999                | 85.39±0.91         | 0.9990                 |
| Ru <sub>Mn<sub>15</sub>,CeO<sub>2</sub></sub> | 54.9±0.98         | 0.9999                | 61.72±0.59         | 0.9996                 |
| Ru <sub>Mn<sub>20</sub>,CeO<sub>2</sub></sub> | 70.5±0.45         | 0.9998                | 57.85±1.57         | 0.9953                 |
| Rh <sub>CeO<sub>2</sub></sub>                 | 52.2±0.91         | 0.9981                | –                  | 0.896                  |
| Pd <sub>CeO<sub>2</sub></sub>                 | 118.5±0.94        | 0.9971                | –                  | 0.6989                 |
| Ag <sub>CeO<sub>2</sub></sub>                 | 49.8±0.76         | 0.9997                | –                  | 0.9641                 |
| Sn <sub>CeO<sub>2</sub></sub>                 | 96.5±11.1         | 0.9880                | 11.63±0.62         | 0.9973                 |
| Re <sub>CeO<sub>2</sub></sub>                 | 14.3±1.29         | 0.9925                | 12.45±0.68         | 0.9974                 |
| Ir <sub>CeO<sub>2</sub></sub>                 | 13.51±0.69        | 0.9998                | 13.51±0.69         | 0.9974                 |
| Pt <sub>CeO<sub>2</sub></sub>                 | 32.3±0.91         | 0.9988                | –                  | -0.9152                |
| Au <sub>CeO<sub>2</sub></sub>                 | 123.4±0.87        | 0.9992                | –                  | -0.0109                |
| Pb <sub>CeO<sub>2</sub></sub>                 | 162.6±0.98        | 0.9992                | –                  | -0.9631                |
| Gd <sub>CeO<sub>2</sub></sub>                 | 11.5±6.06         | 0.9925                | 12.46±0.67         | 0.9973                 |
| Er <sub>CeO<sub>2</sub></sub>                 | 118.5±1.52        | 0.9971                | –                  | 0.6988                 |

a. The apparent activation energy was calculated using four parallel experiments with the same material. The Arrhenius plot fit is presented in Fig. S5.

b. The apparent activation energy was calculated using four parallel experiments with the same material. Some experiments did not lead to satisfactory Arrhenius plot fit in feed (ii) (presented in Fig. S6).

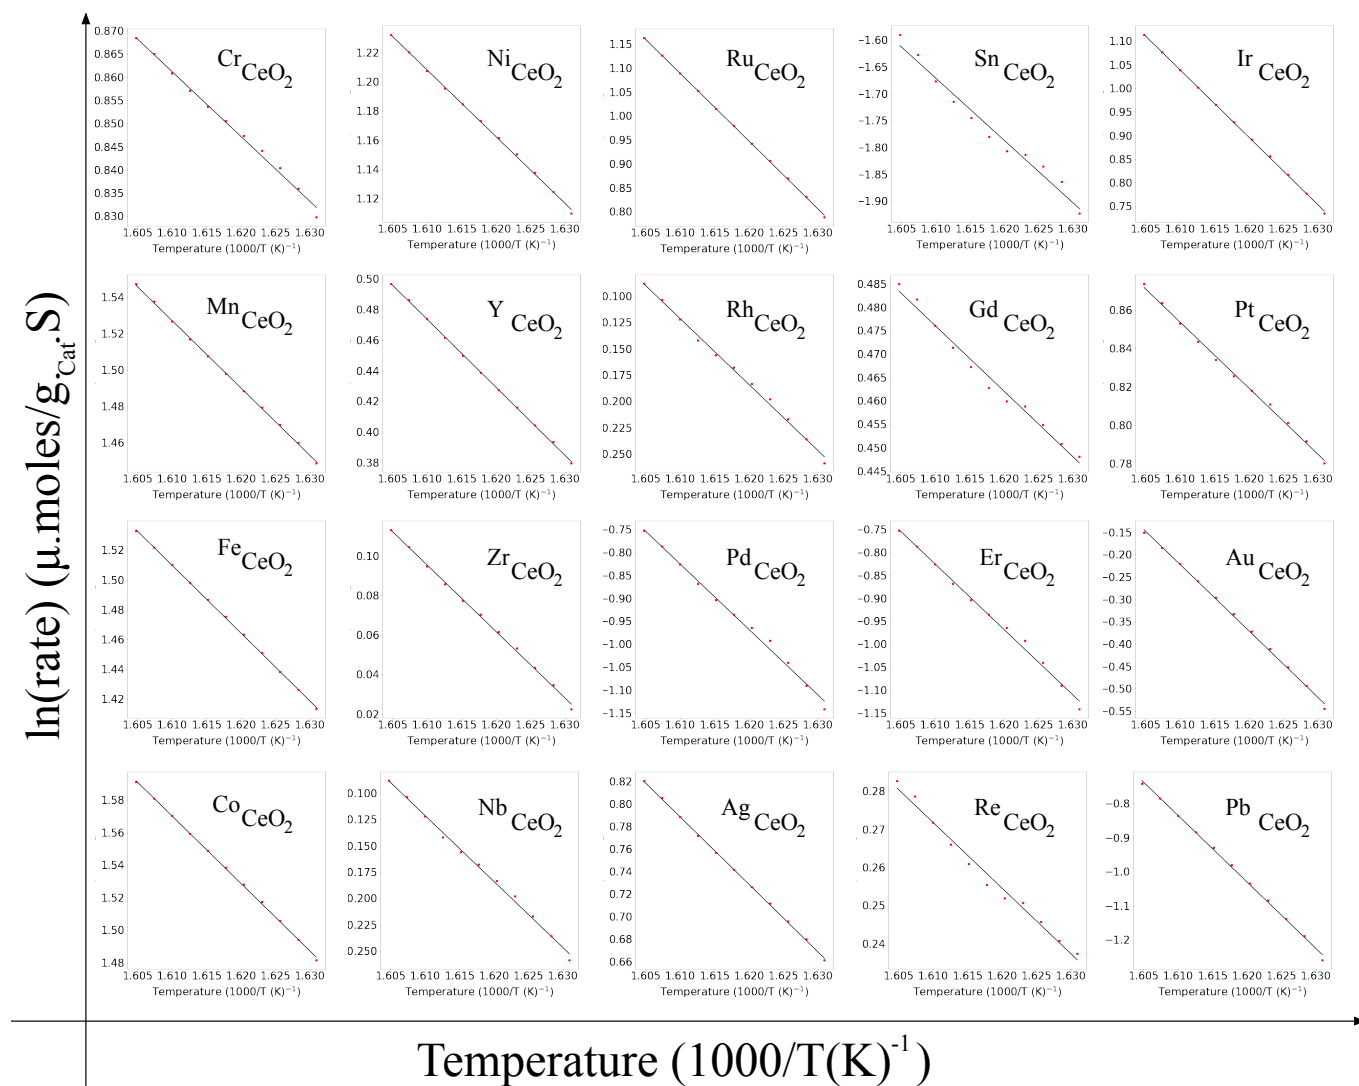

Figure S5: Arrhenius plot of the rate of NO oxidation to NO<sub>2</sub> on all mono-metallic catalysts as a function of temperature with Feed (i): 10% NO, 6% O<sub>2</sub>, 15% H<sub>2</sub>O and rest Ar, at WHSV= 24,000 Ncm<sup>3</sup>/g<sub>cat</sub>h at ambient pressure.

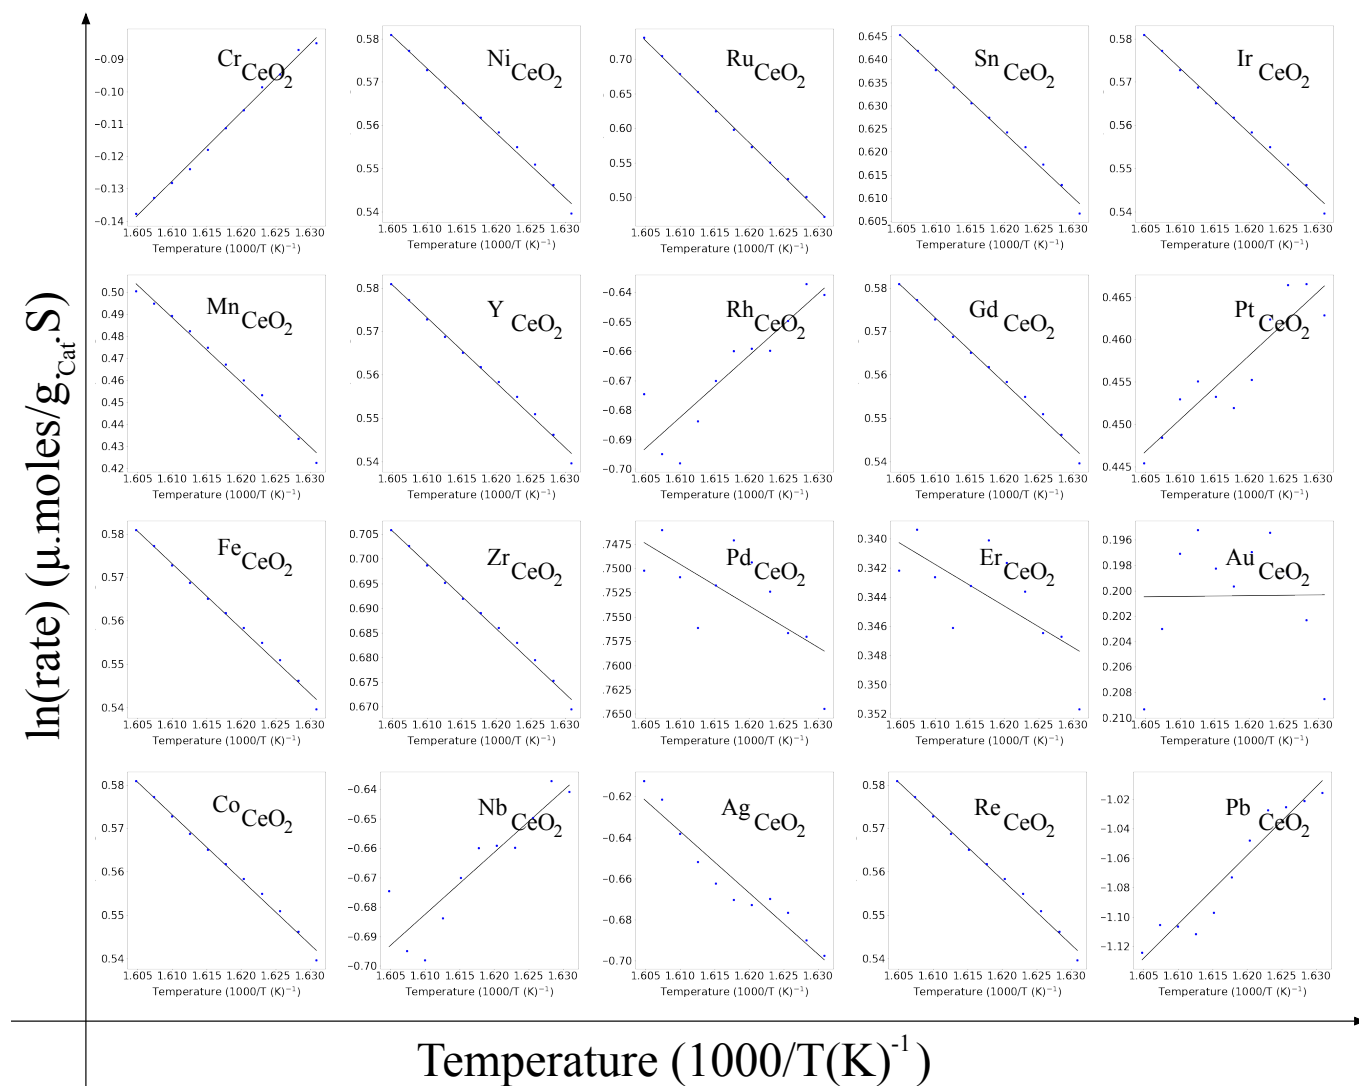

Figure S6: Arrhenius plot of the rate of NO oxidation to NO<sub>2</sub> on all mono-metallic catalysts as a function of temperature with Feed (ii): 8% NO, 2% NO<sub>2</sub>, 5% O<sub>2</sub>, 15% H<sub>2</sub>O and rest Ar, at WHSV= 24,000 Ncm<sup>3</sup>/g<sub>cat</sub>h at ambient pressure.

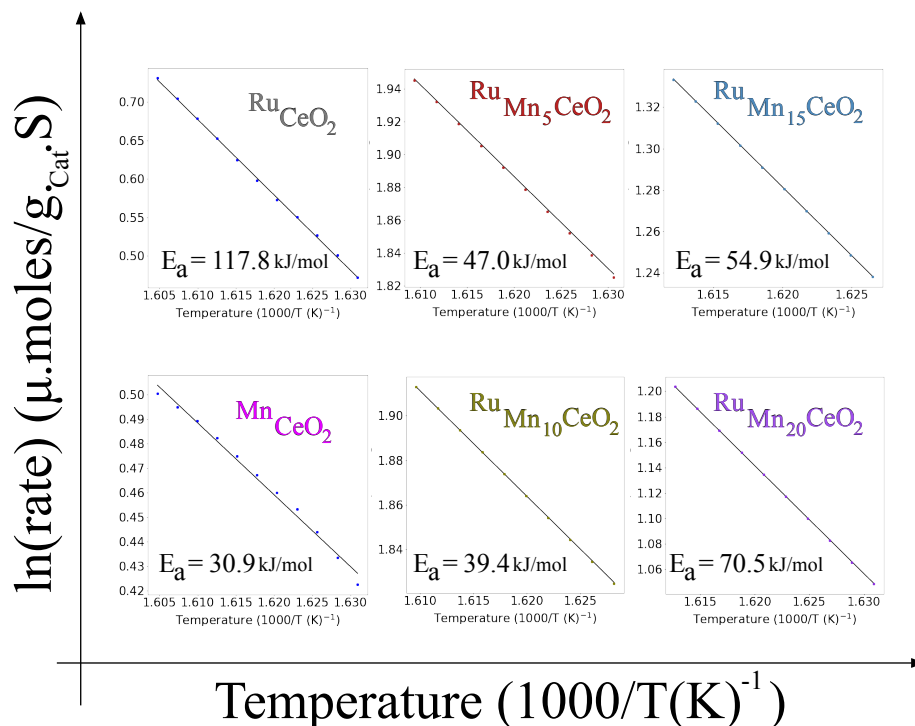

Figure S7: Arrhenius plot of the rate of NO oxidation to NO<sub>2</sub> on the monometallic MnCeO<sub>2</sub> and RuCeO<sub>2</sub> catalysts in comparison with bimetallic RuMn<sub>5</sub>CeO<sub>2</sub>, RuMn<sub>10</sub>CeO<sub>2</sub>, RuMn<sub>15</sub>CeO<sub>2</sub> and RuMn<sub>20</sub>CeO<sub>2</sub> catalysts as a function of temperature with feed (i): 10% NO, 6% O<sub>2</sub>, 15% H<sub>2</sub>O and rest Ar, at WHSV= 24,000 Ncm<sup>3</sup>/g<sub>cat</sub>h at ambient pressure.

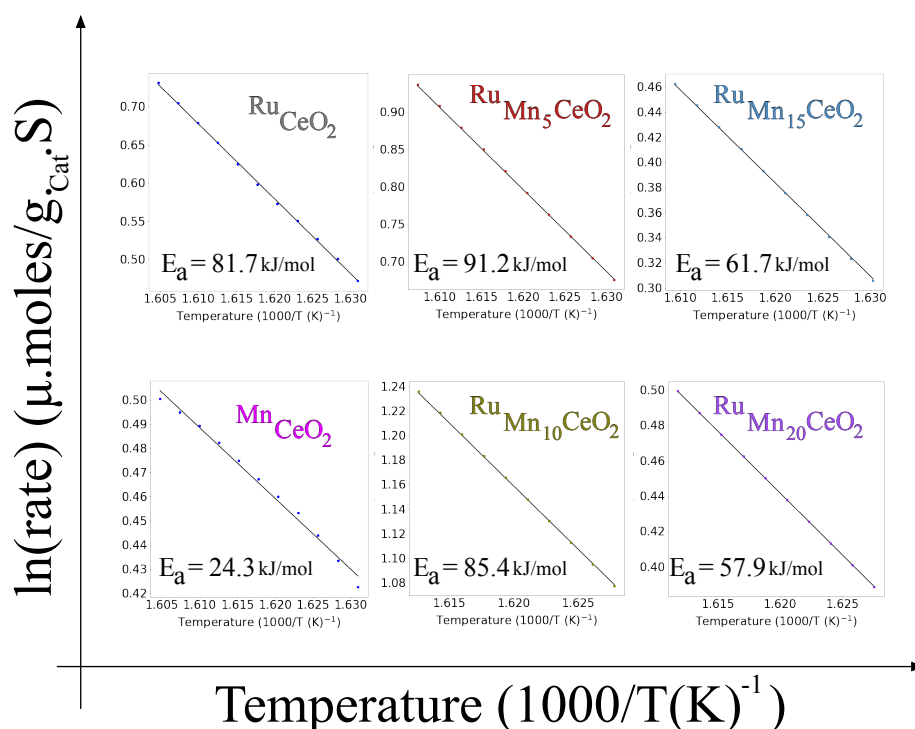

Figure S8: Arrhenius plot of the rate of NO oxidation to NO<sub>2</sub> on the monometallic MnCeO<sub>2</sub> and RuCeO<sub>2</sub> catalysts in comparison with bimetallic RuMn<sub>5</sub>CeO<sub>2</sub>, RuMn<sub>10</sub>CeO<sub>2</sub>, RuMn<sub>15</sub>CeO<sub>2</sub> and RuMn<sub>20</sub>CeO<sub>2</sub> catalysts as a function of temperature with feed (ii): 8% NO, 2% NO<sub>2</sub>, 5% O<sub>2</sub>, 15% H<sub>2</sub>O and rest Ar, at WHSV= 24,000 Ncm<sup>3</sup>/g<sub>cat</sub>h at ambient pressure.
